# Supplementary material for: A high energy efficiency and long life aqueous Zn–I2 battery
Source: Royal Society of Chemistry journal article supplement (doi:10.1039/c9ta13081k), 2020-01-01
Supplement: c9ta13081k1.pdf [file c9ta13081k1.pdf]

## Supporting Information

### **A high energy efficiency and long life aqueous Zn-I<sub>2</sub> battery**

**Wei Li, Kangli Wang,\* and Kai Jiang\***

State Key Laboratory of Advanced Electromagnetic Engineering, School of Electrical and Electronic Engineering, Huazhong University of Science and Technology, Wuhan 430074, P. R. China.

E-mail: [klwang@hust.edu.cn](mailto:klwang@hust.edu.cn); [kjiang@hust.edu.cn](mailto:kjiang@hust.edu.cn)

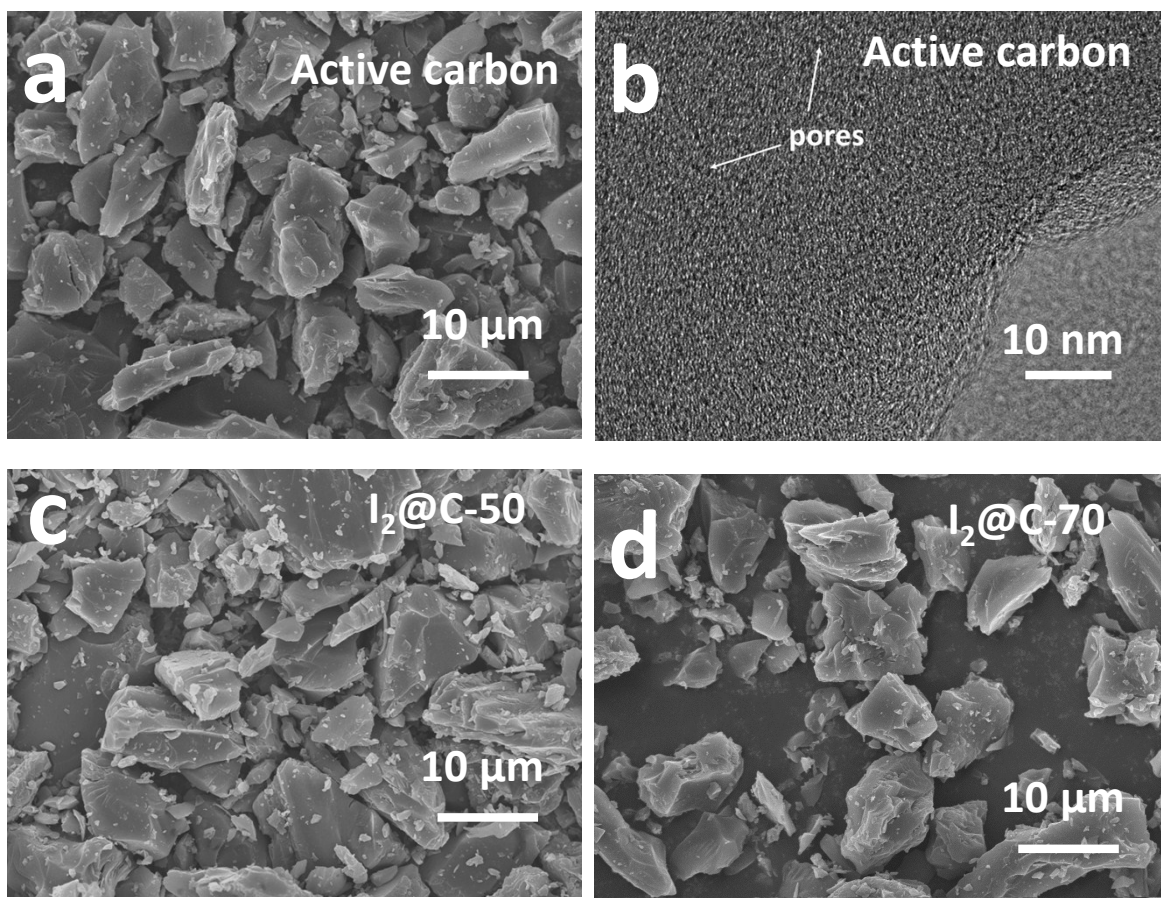

Figure S1. SEM images of (a, c, d) activated carbon, I<sub>2</sub>@C-50 and I<sub>2</sub>@C-70 composite, (b) TEM image of active carbon.

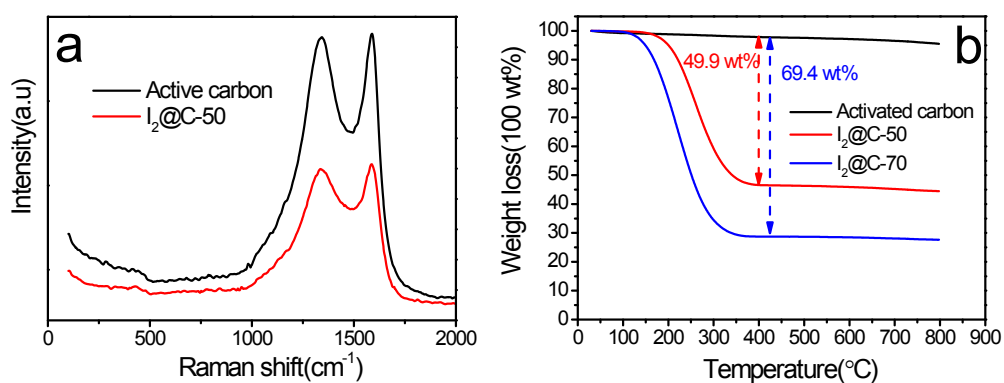

Figure S2. (a) Raman spectra of activated carbon and I<sub>2</sub>@C-50 composite, (b) TG curves of activated carbon, I<sub>2</sub>@C-50 and I<sub>2</sub>@C-70 composite.

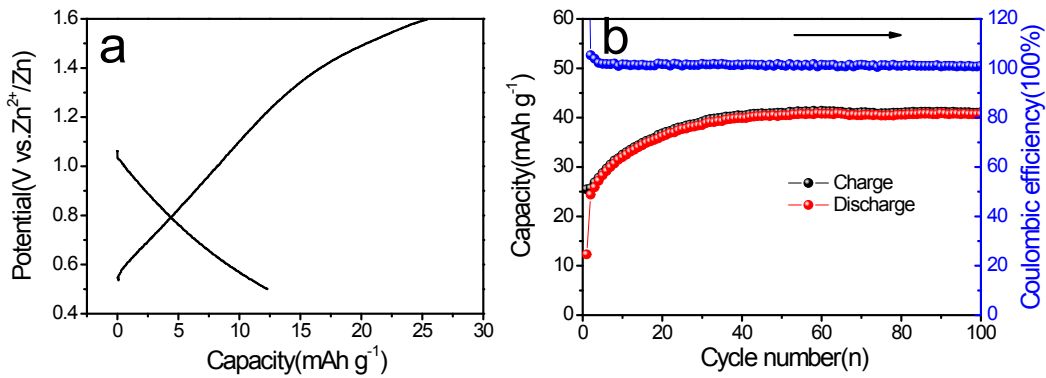

Figure S3. (a) The initial charge and discharge profiles and (b) cycling performance of active carbon at a current density of  $100 \text{ mA g}^{-1}$  in  $2 \text{ M Zn}(\text{CF}_3\text{SO}_3)_2$ .

The initial charge capacity of active carbon is  $26 \text{ mAh g}^{-1}$ . Given the active carbon content (50 wt%, 40wt% active carbon + 10wt% acetylene black) in  $\text{I}_2@\text{C-50}$  electrode, the capacity contribution from active carbon is about  $13 \text{ mAh g}^{-1}$ .

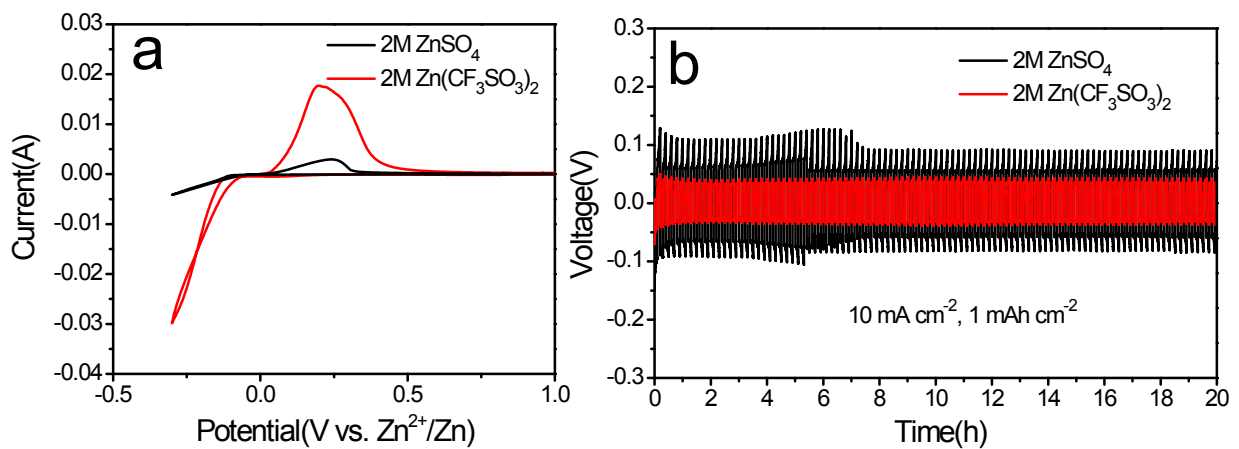

Figure S4. (a) CV curves of Zn electrode in aqueous electrolytes of  $2 \text{ M ZnSO}_4$  and  $2 \text{ M Zn}(\text{CF}_3\text{SO}_3)_2$  at the scan rate of  $0.5 \text{ mV s}^{-1}$  between  $-0.3$  and  $1.0 \text{ V}$ . (b) Galvanostatic cycling of Zn/Zn symmetrical cells at  $10 \text{ mA cm}^{-2}$  in  $2 \text{ M ZnSO}_4$  and  $2 \text{ M Zn}(\text{CF}_3\text{SO}_3)_2$  electrolytes.

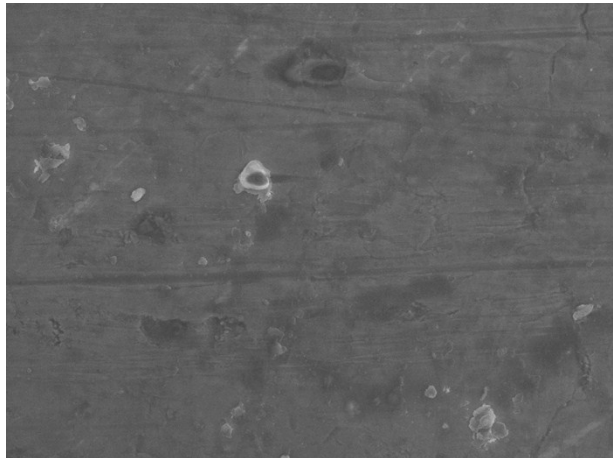

Figure S5. SEM image of Zn fresh foil

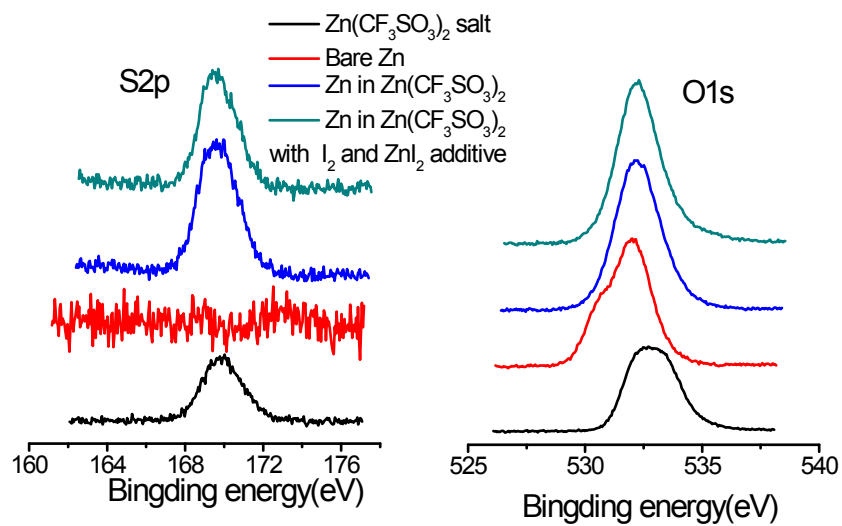

Figure S6. XPS spectra of S2p and O1s of Zn(CF<sub>3</sub>SO<sub>3</sub>)<sub>2</sub>, Zn foil, and Zn soaked in electrolyte of 2M Zn(CF<sub>3</sub>SO<sub>3</sub>)<sub>2</sub> with or without I<sub>2</sub> and ZnI<sub>2</sub> additive.

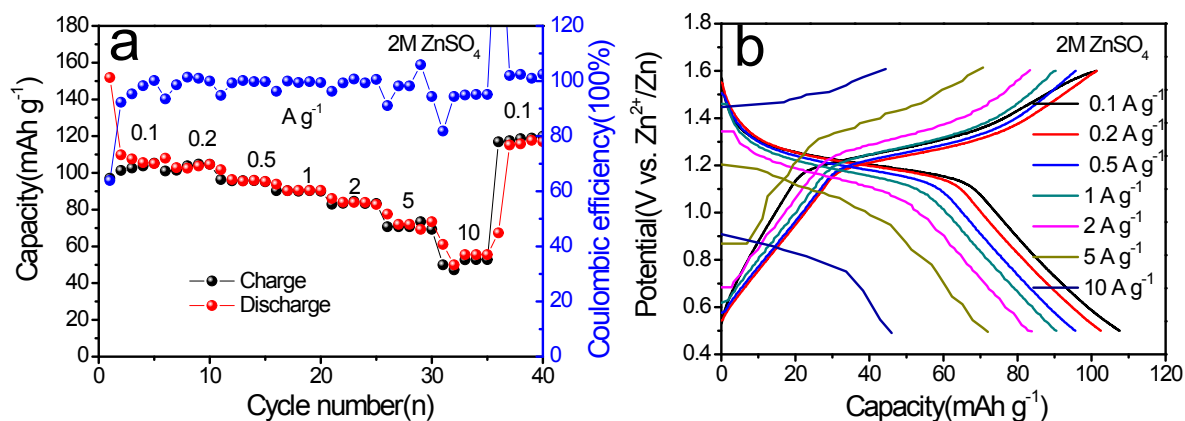

Figure S7. (a) Rate capacities and (b) discharge and charge profiles of I<sub>2</sub>@C-50 electrode in 2 M ZnSO<sub>4</sub> at current densities from 0.1 to 10 A g<sup>-1</sup>.

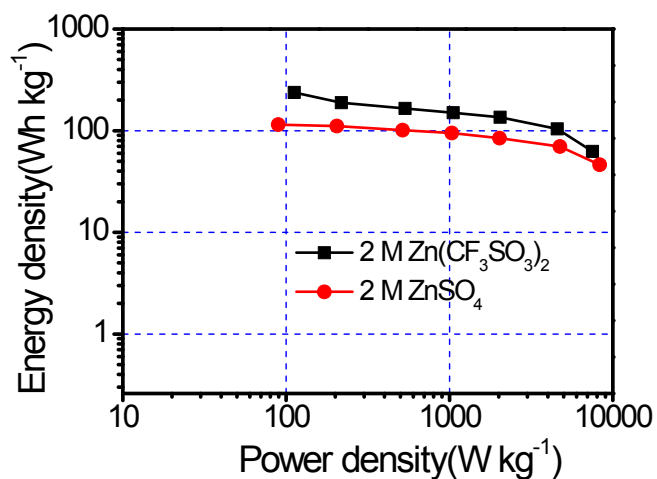

Figure S8. Ragone plots of I<sub>2</sub>@C-50 electrode in 2 M ZnSO<sub>4</sub> and 2 M Zn(CF<sub>3</sub>SO<sub>3</sub>)<sub>2</sub> electrolytes at current densities from 0.1 to 10 A g<sup>-1</sup>.

Table S1 Comparison of I<sub>2</sub>@C-50 and I<sub>2</sub>@C-70 with recently reported aqueous Zn-based batteries

| System                                                                             | Voltage (V) | Energy density (Wh kg <sup>-1</sup> ) | Current density (A g <sup>-1</sup> ) | Cycling | Ref.                                 |
|------------------------------------------------------------------------------------|-------------|---------------------------------------|--------------------------------------|---------|--------------------------------------|
| I <sub>2</sub> @C-50                                                               | 1.2         | -                                     | 1                                    | 5000    | This work                            |
| I <sub>2</sub> @C-70                                                               | 1.2         | -                                     | 1                                    | 10000   | This work                            |
| I <sub>2</sub> @C-50                                                               | 1.2         | 237                                   | 5                                    | 10000   | This work                            |
| MnO <sub>2</sub>                                                                   | 1.44        | -                                     | 1.54                                 | 5000    | Nat. Energy 2016 ,1,16039            |
| Zn <sub>0.25</sub> V <sub>2</sub> O <sub>5</sub> ·nH <sub>2</sub> O                | 0.7         | 250                                   | 2.4                                  | 1000    | Nat. Energy 2016,1, 16119            |
| I <sub>2</sub> /ACC                                                                | 1.2         | -                                     | 1.055                                | 1500    | Nano Research 2018, 11, 3548         |
| Na <sub>3</sub> V <sub>2</sub> (PO <sub>4</sub> ) <sub>2</sub> F <sub>3</sub>      | 1.62        | 100                                   | 1                                    | 4000    | Energy Storage Mater. 2018,15, 14    |
| ZnHCF                                                                              | 1.7         | 100                                   | 0.06                                 | 100     | Adv. Energy Mater. 2015, 5, 1400930  |
| Na <sub>3</sub> V <sub>2</sub> (PO <sub>4</sub> ) <sub>3</sub>                     | 1.1         | 100                                   | 0.05                                 | 100     | Nano Energy 2016, 25, 211            |
| VS <sub>2</sub>                                                                    | 0.6         | 123                                   | 0.5                                  | 200     | Adv. Energy Mater. 2017, 7, 1601920  |
| Na <sub>1.1</sub> V <sub>3</sub> O <sub>7.9</sub>                                  | 0.7         | □                                     | □                                    | 100     | Energy Storage Mater. 2018, 13, 168. |
| ZnHCF@MnO <sub>2</sub>                                                             | 1.7         | 149                                   | □                                    | 1000    | J. Mater. Chem. A, 2017, 5, 23628    |
| Zn <sub>3</sub> V <sub>2</sub> O <sub>7</sub> (OH) <sub>2</sub> ·2H <sub>2</sub> O | 0.7         | 150                                   | 0.2                                  | 300     | Adv. Mater. 2017, 1705580            |
| Zn <sub>2</sub> (OH)VO <sub>4</sub>                                                | 0.8         | 200                                   | 4                                    | 2000    | Adv. Mater. 2018, 1803181            |
| H <sub>2</sub> V <sub>3</sub> O <sub>8</sub>                                       | 0.7         | 168                                   | 6                                    | 2000    | Adv. Energy Mater. 2018, 1800144     |
| K <sub>2</sub> V <sub>6</sub> O <sub>16</sub> ·2.7H <sub>2</sub> O                 | 0.8         | 172                                   | 6                                    | 500     | J. Mater. Chem. A 2018, 6, 15530     |
| VO <sub>2</sub>                                                                    | 0.6         | 160                                   | 4                                    | 1000    | Energy Storage Mater.2019,17, 143    |
| ZnMn <sub>2</sub> O <sub>4</sub>                                                   | 1.4         | 202                                   | 0.5                                  | 500     | J. Am. Chem. Soc. 2016, 138, 12894   |
| LiV <sub>2</sub> (PO <sub>4</sub> ) <sub>3</sub>                                   | 1.4         | 218                                   | 1.5                                  | 4000    | Energy Environ. Sci. 2018, 11, 3168  |
| Ca <sub>0.25</sub> V <sub>2</sub> O <sub>5</sub> ·nH <sub>2</sub> O                | 0.8         | 267                                   | -                                    | 5000    | Angew. Chem. Int. Ed. 2018, 57, 3943 |
| Na <sub>2</sub> V <sub>6</sub> O <sub>16</sub> ·3H <sub>2</sub> O                  | 0.8         | 287                                   | 14.4                                 | 1000    | Nano Lett. 2018, 18, 2402–2410       |
| V <sub>2</sub> O <sub>5</sub> ·nH <sub>2</sub> O                                   | 0.7         | 290                                   | 6                                    | 900     | Adv. Mater. 2017, 1703725            |
| V <sub>2</sub> O <sub>5</sub> ·nH <sub>2</sub> O                                   | 0.7         | 322                                   | 5                                    | 4000    | ACS Energy Lett. 2018, 3, 1366       |
| Mg <sub>x</sub> V <sub>2</sub> O <sub>5</sub> ·nH <sub>2</sub> O                   | 0.7         | -                                     | 1                                    | 1000    | ACS Energy Lett. 2018, 3, 2602       |
| Zn <sub>2</sub> V <sub>2</sub> O <sub>7</sub>                                      | 0.8         | 166                                   | 4                                    | 1000    | J. Mater. Chem. A 2018, 6, 3850      |
| Li <sub>x</sub> V <sub>2</sub> O <sub>5</sub> ·nH <sub>2</sub> O                   | 0.8         | -                                     | 10                                   | 1000    | Energy Environ. Sci. 2018, 11, 3157  |
| Co <sub>3</sub> O <sub>4</sub>                                                     | 2.2         | 360.8                                 | 4                                    | 5000    | Energy Environ. Sci. 2018, 11, 2521  |
| a-MnO <sub>2</sub>                                                                 | 1.3         | -                                     | 2.772                                | 1000    | Energy Environ. Sci. 2018, 11, 941   |
| PTO                                                                                | 0.8         | 186.7                                 | 3                                    | 1000    | Angew. Chem. Int. Ed. 2018, 57, 1173 |
| C4Q                                                                                | 1           | 220                                   | 0.5                                  | 1000    | Sci. Adv. 2018, 4, 1761              |
| PANI                                                                               | 1.1         | -                                     | 5                                    | 3000    | Adv. Funct. Mater. 2018, 28, 1804975 |

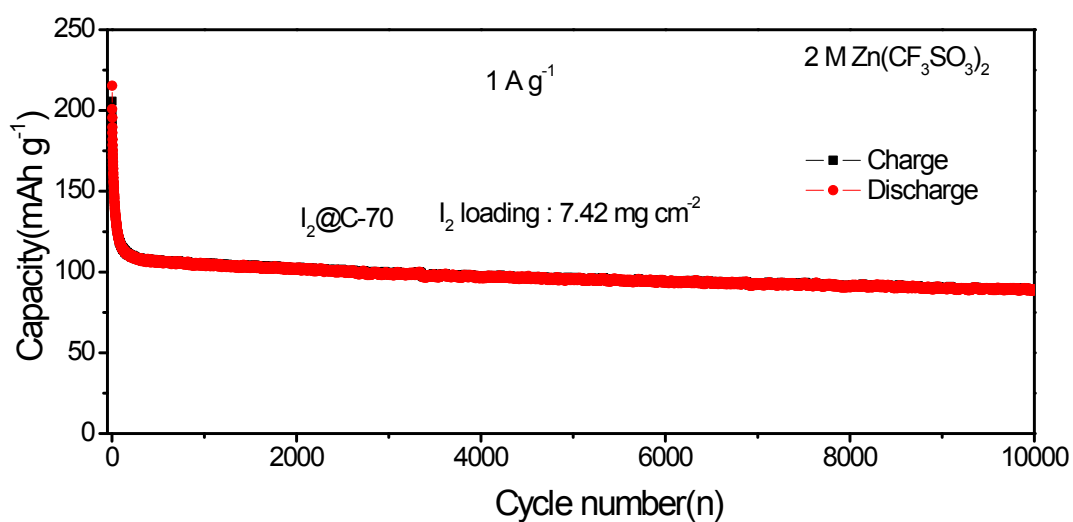

Figure S9. Cycling performance of  $I_2@C-70$  composite with a  $I_2$  mass loading of  $7.42 \text{ mg cm}^{-2}$  in  $2 \text{ M Zn}(\text{CF}_3\text{SO}_3)_2$  at  $1 \text{ A g}^{-1}$ .

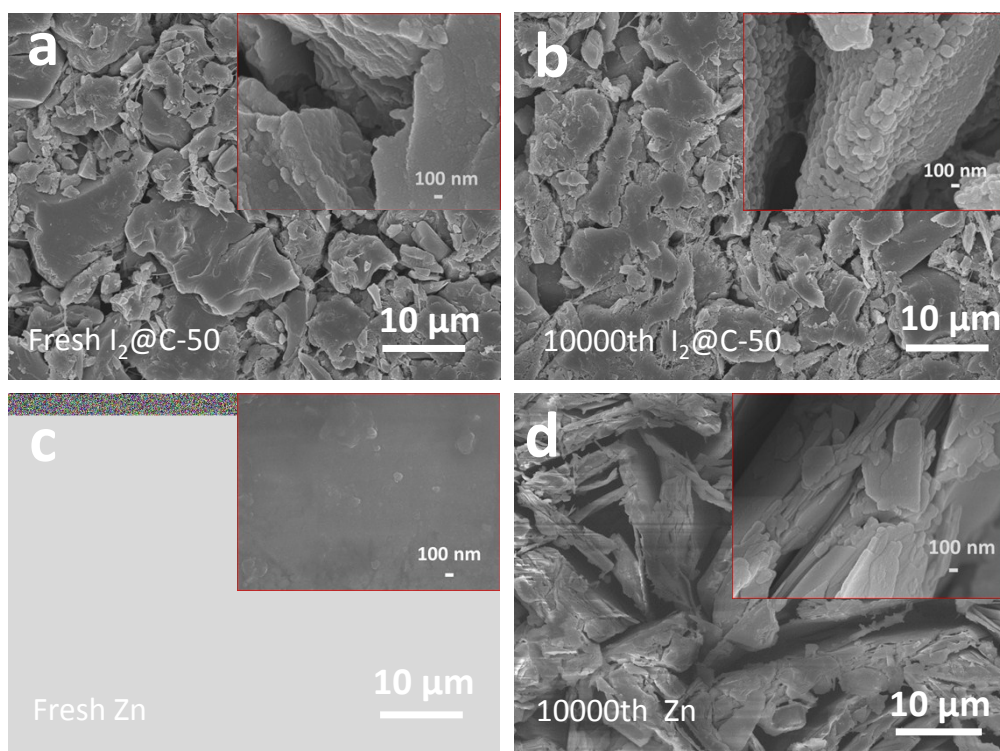

Figure S10. SEM images of pristine and cycled (a, b)  $I_2@C-70$  and (c, d) Zn foil in  $2 \text{ M Zn}(\text{CF}_3\text{SO}_3)_2$  at a current density of  $5 \text{ A g}^{-1}$ .



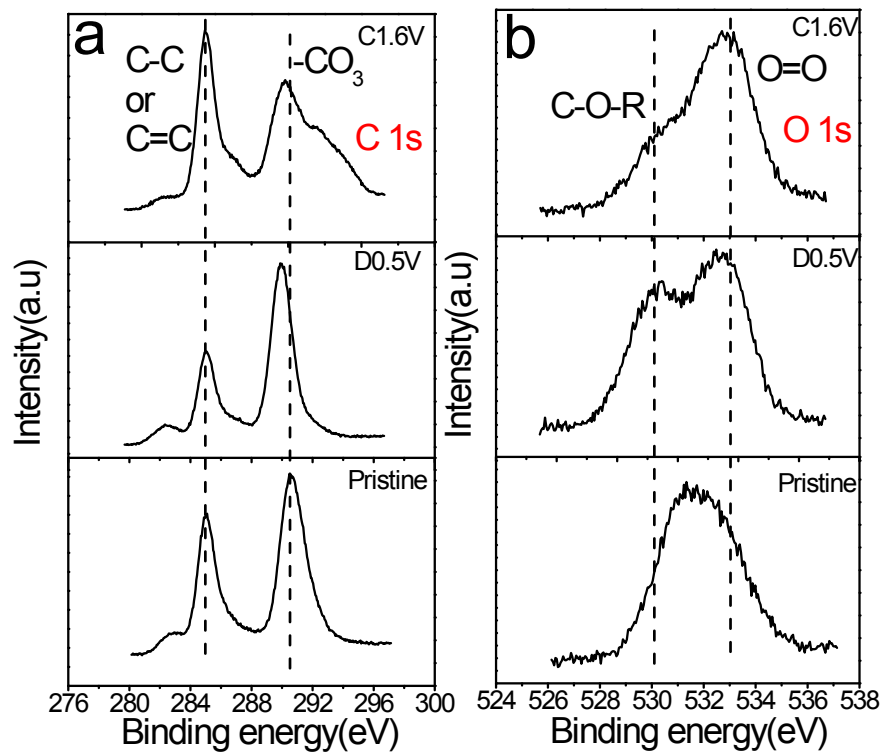

Figure S11. XPS spectra of (a) C1s and (b) O1s at pristine, discharged and charged states.
